# Supplementary material for: Protective Effect of Vegan Microbiota on Liver Steatosis Is Conveyed by Dietary Fiber: Implications for Fecal Microbiota Transfer Therapy
Source: Nutrients. 2023 Jan 15;15(2):454. doi: 10.3390/nu15020454 (PMC9867259; doi:10.3390/nu15020454)
Supplement: Supplementary file 1 [file nutrients-15-00454-s001.zip]

Archive with 8 entries (8 files):
- Figure S1 (diversity, timepoint A)_no_points.pdf
- Figure S2 R1 (PCA, timepoint A).pdf
- Figure S3 R1 (cecum_alfa_diversity_B).pdf
- Figure S4 (serum).pdf
- File S1.pdf
- Table S1_MB_cecum_phylum.xlsx
- Table S2_MB_cecum_species.xlsx
- Table S3_cecum_VOCs.xlsx
