# Supplementary material for: Protective Effect of Vegan Microbiota on Liver Steatosis Is Conveyed by Dietary Fiber: Implications for Fecal Microbiota Transfer Therapy
Source: Nutrients. 2023 Jan 15;15(2):454. doi: 10.3390/nu15020454 (PMC9867259; doi:10.3390/nu15020454)
Supplement: Supplementary file 1 [file nutrients-15-00454-s001.zip › Figure S3 R1 (cecum_alfa_diversity_B).pdf]

**A L\_1 (Phylum)**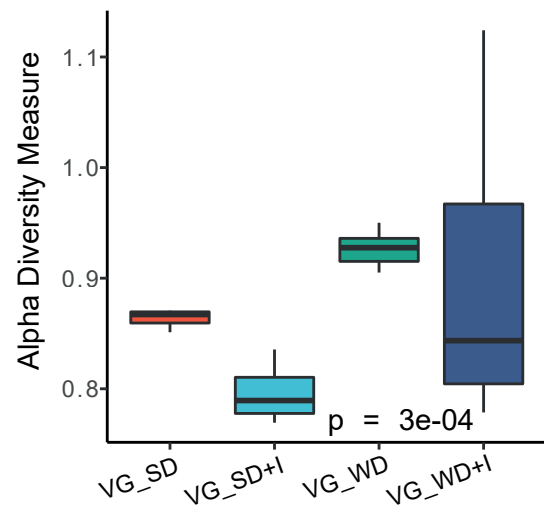**B L\_4 (Family)**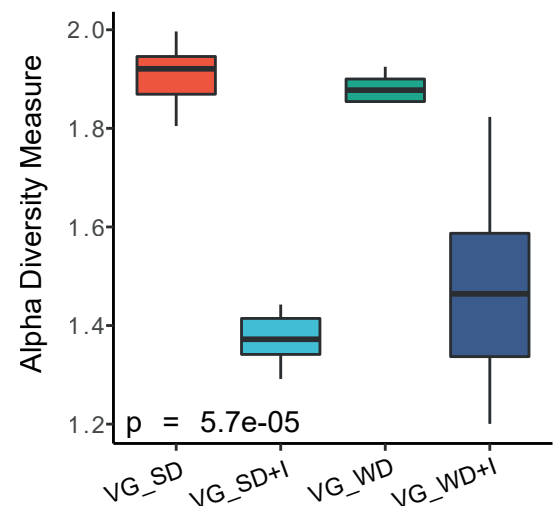**C L\_5 (Genus)**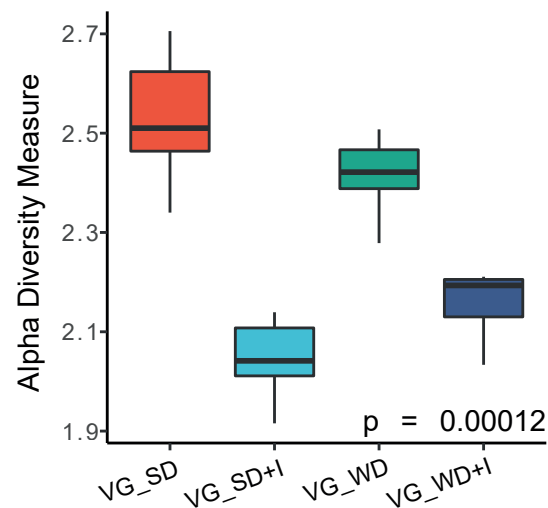**D L\_6 (Species)**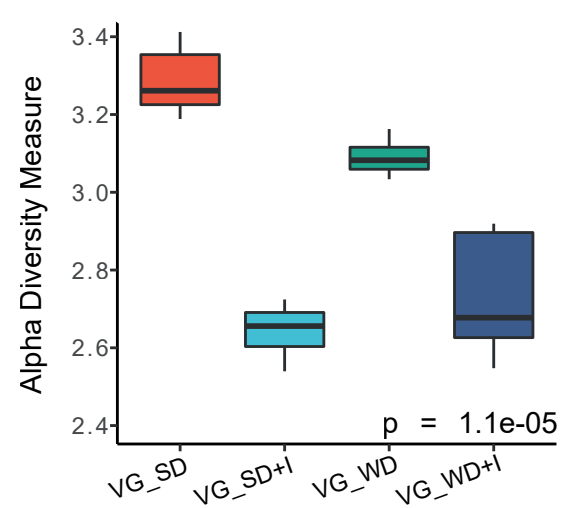**E**

| comparison   | phylum | family | genus | species |
|--------------|--------|--------|-------|---------|
| SD to WD     | 0.089  | 0.678  | 0.300 | 0.097   |
| SD to SD+I   | 0.059  | 0.001  | 0.000 | 0.000   |
| SD to WD+I   | 0.814  | 0.003  | 0.007 | 0.000   |
| WD to WD+I   | 0.063  | 0.007  | 0.079 | 0.027   |
| SD+I to WD+I | 0.074  | 0.646  | 0.269 | 0.649   |

**Supplementary Figure S3** Alpha diversity of cecum microbiota in timepoint B assessed as Shannon index. A, taxonomic level phylum; B, taxonomic level family; C, taxonomic level Genus; D, taxonomic level Species; E, adjusted p-values.
