# Supplementary material for: Protective Effect of Vegan Microbiota on Liver Steatosis Is Conveyed by Dietary Fiber: Implications for Fecal Microbiota Transfer Therapy
Source: Nutrients. 2023 Jan 15;15(2):454. doi: 10.3390/nu15020454 (PMC9867259; doi:10.3390/nu15020454)
Supplement: Supplementary file 1 [file nutrients-15-00454-s001.zip › Table S1_MB_cecum_phylum.xlsx]

## Sheet: summary_cecum_phylum
Table S1 The cecum microbiota composition: level L_1 (phylum).
	lrt_pval	effect size				p-value adjusted				SD			WD			SD+I			WD+I
	_adjust	SD+I_SD	WD_SD	WD+I_SD	WD+I_WD	SD+I_SD	WD_SD	WD+I_SD	WD+I_WD	median	Q1	Q3	median	Q1	Q3	median	Q1	Q3	median	Q1	Q3
Bacteroidota	0.00212943	-0.0376861	0.335938	-0.252331	0.0836073	0.860685	0.00150617	0.0259531	0.476288	56.7276	53.3702	57.5006	59.3465	56.0516	59.5664	44.2609	40.8528	47.5104	40.3483	37.4076	45.6082
Firmicutes	4.55921e-27	0.676982	-0.657925	0.535938	1.19386	1.3991e-06	1.50649e-06	0.000364039	3.50637e-19	38.6875	37.5777	42.1499	33.3998	32.9374	37.6309	53.9149	50.2154	56.1225	53.109	47.132	58.2613
Desulfobacterota	1.12468e-17	-1.62812	-0.122267	-0.7082	-0.585933	1.81641e-16	0.660267	0.000680679	0.00666534	3.2102	2.96777	3.36715	4.03771	3.45337	4.24317	0.874311	0.819056	0.960066	1.79104	1.28118	2.17836
Campylobacterota	0.830632	-1.43503	-1.83339	1.09112	2.92451	0.860685	0.660267	0.804104	0.480581	0	0	0	0	0	0	0	0	0	0	0	0
Verrucomicrobiota	0.0381384	0	16.0296	25.6596	9.63005	1	0.000256609	2.83501e-08	0.0421178	0	0	0	0	0	0	0	0	0	0	0	3.34322
Actinobacteriota	1.13263e-09	-0.256802	2.48268	1.82006	-0.662615	0.860685	1.05976e-06	0.000680679	0.275388	0.168067	0.151943	0.19369	1.51745	0.778679	1.85589	0.114985	0.079921	0.139903	0.216942	0.11043	1.14854
Proteobacteria	0.00649343	0.30332	-0.0744873	-0.292404	-0.217917	0.164062	0.660267	0.11798	0.275388	1.23334	1.15678	1.32705	1.64752	1.52754	1.73533	1.22791	0.991437	1.36042	0.933196	0.67686	1.18855
The data are shown as percentage of the total (all reads in one sample = 100%).
We report both the p-values from the likelihood ratio test and from the pairwise Wald tests. The p-values were adjusted using Benjamin-Hochberg correction.
The reported effect size is log 2 fold change obtained by DESeq2.
