# Supplementary material for: Protective Effect of Vegan Microbiota on Liver Steatosis Is Conveyed by Dietary Fiber: Implications for Fecal Microbiota Transfer Therapy
Source: Nutrients. 2023 Jan 15;15(2):454. doi: 10.3390/nu15020454 (PMC9867259; doi:10.3390/nu15020454)
Supplement: Supplementary file 1 [file nutrients-15-00454-s001.zip › Table S2_MB_cecum_species.xlsx]

## Sheet: summary_cecum_species
Table S2 The cecum microbiota composition: level L_6 (species).
	lrt_pval	effect size				p-value adjusted				SD			WD			SD+I			WD+I
	_adjust	SD+I_SD	WD_SD	WD+I_SD	WD+I_WD	SD+I_SD	WD_SD	WD+I_SD	WD+I_WD	median	Q1	Q3	median	Q1	Q3	median	Q1	Q3	median	Q1	Q3
Blautia_NA	1.15473e-88	3.96682	0.392335	3.35561	2.96328	2.88716e-66	0.222285	2.84005e-44	1.03316e-38	3.5537	3.22326	4.01663	3.7122	3.26914	4.14182	25.3426	20.4704	27.88	17.4129	11.7227	18.7598
Lachnoclostridium_NA	8.96859e-54	0.757604	0.238042	3.26984	3.0318	0.00634238	0.572442	2.16573e-35	4.12491e-34	3.22968	2.99448	3.61896	3.36959	2.8714	3.46397	2.40508	2.07941	2.89895	15.3731	9.14239	16.1492
Angelakisella_NA	9.62083e-43	-3.27363	2.34284	0.0970951	-2.24575	5.5282e-10	3.56114e-12	0.872832	7.45611e-10	0.137329	0.135786	0.140128	0.492852	0.421784	0.68146	0	0	0.00962939	0.058546	0.0365556	0.0789765
Blautia_hydrogenotrophica	7.04803e-42	-8.70215	-0.357777	-3.60007	-3.24229	1.41764e-24	0.587803	1.87666e-12	8.44008e-11	0.57082	0.533645	0.659664	0.348976	0.329167	0.451249	0	0	0	0	0	0.0296009
Bacteroides_uniformis	2.21799e-29	4.46433	-0.461543	4.03405	4.49559	4.4652e-19	0.572442	8.0843e-15	3.25965e-20	1.00464	0.600707	1.57006	0.39185	0.380933	0.628658	10.9046	6.94881	14.3413	7.51244	5.44562	9.83005
Collinsella_stercoris	9.93567e-25	-1.10972	8.90895	3.80952	-5.09943	0.489065	3.52519e-15	0.00211502	6.97339e-08	0	0	0	1.51745	0.750869	1.7389	0	0	0	0	0	0.0332545
Flavonifractor_NA	3.26574e-23	-1.36477	1.92047	0.101861	-1.8186	0.000277728	2.22426e-08	0.858049	2.03988e-07	0.345897	0.225089	0.402207	0.995452	0.922364	1.07165	0.0507519	0.0413165	0.0727081	0.142056	0.0856483	0.19039
Lactonifactor_NA	4.47349e-19	4.17204	1.25296	11.2655	10.0126	0.0016166	0.543642	2.24919e-18	4.39395e-17	0	0	0.0159033	0.0143116	0	0.036386	0.022575	0	0.0779554	8.3954	7.32752	14.4839
Bacteroides_ovatus	2.84379e-18	1.29476	-4.47062	0.085849	4.55647	0.0368366	4.35996e-15	0.934186	5.78688e-16	2.8642	1.87741	3.53831	0.0683777	0.0355735	0.125145	2.69922	1.9695	3.66829	1.11401	0.643545	1.46315
Butyricicoccaceae_UCG-009_NA	4.04552e-16	-4.42312	0.521501	-6.03031	-6.55181	4.00339e-07	0.61753	8.30956e-09	1.61978e-10	0.153598	0.129908	0.19819	0.195916	0.152955	0.240117	0	0	0	0	0	0
Lachnospiraceae UCG-004_NA	6.25481e-15	0.66147	-0.747254	-4.819	-4.07175	0.206445	0.231389	2.4753e-12	2.49591e-09	0.334466	0.321265	0.372336	0.19269	0.0906402	0.286656	0.236897	0.192222	0.297668	0	0	0
[Clostridium] innocuum group_NA	9.05103e-15	-0.430748	0.123207	1.35881	1.2356	0.103479	0.764514	4.16463e-08	1.63658e-07	2.85714	2.19695	3.41352	2.36491	2.25251	2.90089	0.96091	0.846946	1.04528	2.91447	2.59196	3.80859
Alistipes_putredinis	2.01419e-14	-1.14761	0.969161	0.27473	-0.694431	4.46352e-05	0.000765193	0.384245	0.0150646	2.52747	2.30681	4.36403	5.17762	4.89432	5.70508	0.641854	0.516855	0.795949	1.64179	1.30946	2.06229
Agathobacter_NA	4.124e-14	14.4459	3.07561	12.5474	9.4718	4.62071e-19	0.154208	4.98729e-14	1.01751e-10	0	0	0	0	0	0	8.90456	6.29987	11.0429	1.73258	0.547264	3.06096
Bilophila_NA	4.64272e-14	-0.716822	0.617936	0.31627	-0.301666	0.000124367	0.00116353	0.123914	0.14129	3.2102	2.95209	3.36715	4.03771	3.4543	4.24317	0.874311	0.819056	0.960247	1.79104	1.28118	2.16492
Dielma_fastidiosa	1.15866e-13	-1.20688	-1.22349	-4.65798	-3.43449	0.0102246	0.0124005	9.69019e-15	8.5489e-09	0.549451	0.370526	0.606152	0.193126	0.137635	0.216779	0.0808901	0.0615707	0.119078	0	0	0.00840713
Romboutsia_ilealis	1.91385e-13	-2.43122	-1.56168	-8.26213	-6.70045	0.0016166	0.0789655	2.25458e-18	3.97347e-13	2.59733	2.33724	2.84221	0.597338	0.0805667	1.15875	0.219867	0.17825	0.274667	0	0	0
Oscillibacter_NA	7.3208e-13	1.42021	0.852481	-0.649357	-1.50184	4.34477e-07	0.00447717	0.0549954	5.63129e-07	0.331075	0.320961	0.358624	0.523754	0.450627	0.612409	0.426128	0.397649	0.507054	0.0723327	0.0609206	0.112103
Paludicola_NA	1.76023e-11	-2.58019	-1.08906	-8.505	-7.41594	0.0018688	0.29546	4.98729e-14	2.93462e-11	0.910837	0.8658	1.00679	0.35779	0.33921	0.404078	0.0518315	0	0.125257	0	0	0
Eisenbergiella_NA	3.7686e-11	1.26791	-1.6171	-4.64338	-3.02629	0.0896609	0.0448636	3.85475e-07	0.00119488	0.182662	0.133589	0.273893	0.0503807	0.0334432	0.0648899	0.173455	0.0838811	0.256793	0	0	0
[Ruminococcus] torques group_torques	1.03489e-10	-1.31726	0.393694	-1.37416	-1.76786	8.24279e-05	0.364266	7.26557e-05	5.50011e-08	2.68861	1.94989	2.85236	2.53303	2.09038	3.27156	0.443179	0.382893	0.466787	0.337553	0.272285	0.60703
Sutterella_NA	1.36975e-10	-6.92459	3.0071	-6.14231	-9.14942	1.53091e-05	0.0621898	0.000187746	3.39516e-09	0	0	0.310737	1.14484	1.04645	1.40509	0	0	0	0	0	0
Lachnospiraceae NK4A136 group_NA	2.90964e-10	2.04418	1.49214	-1.2836	-2.77574	4.46352e-05	0.00459944	0.02544	8.44461e-08	0.247355	0.213173	0.312699	0.61216	0.520269	0.912522	0.56191	0.237157	0.737211	0.0380508	0	0.0872721
Erysipelatoclostridium_NA	5.31373e-10	3.14579	-0.193721	2.20123	2.39495	4.00339e-07	0.837556	0.000657863	8.18296e-05	0.271493	0.203278	0.323029	0.170149	0.157776	0.220852	0.754763	0.533475	1.27635	0.409885	0.106255	0.801129
Lachnospiraceae_NA_NA	1.63823e-09	0.86733	-1.46118	0.0786179	1.5398	0.0316148	0.000192	0.892005	3.4361e-05	2.41442	2.11645	2.86398	0.62416	0.325624	1.00579	1.98793	1.47471	2.54069	1.0271	0.966971	1.23479
Bacteroides_cellulosilyticus	2.24786e-09	-3.23223	-0.837996	-4.1829	-3.34491	2.90427e-06	0.360524	8.30956e-09	1.50226e-06	2.02365	1.29972	3.03154	1.06366	0.929357	1.185	0.0940307	0.0478452	0.136929	0.0116982	0	0.0716487
Anaerotruncus_colihominis	4.70882e-09	-2.10704	-1.05207	-6.27195	-5.21988	0.00445125	0.237867	2.77987e-09	5.63129e-07	0.198589	0.152134	0.256052	0.0612239	0.0524759	0.105107	0.0145167	0	0.0306034	0	0	0
Coprococcus_catus	5.44384e-09	8.02343	1.6155	6.6583	5.04279	2.95264e-09	0.404853	1.41326e-06	5.45697e-05	0	0	0	0	0	0.0159018	0.530196	0.495713	0.617337	0.243525	0	0.255072
Sellimonas_NA	1.95938e-08	-0.540411	0.8148	-0.55347	-1.36827	0.0802864	0.00683234	0.0911004	1.50226e-06	0.982547	0.837648	1.23072	1.58248	1.36162	1.68495	0.289515	0.234855	0.367344	0.277275	0.175652	0.429086
[Ruminococcus] torques group_NA	9.94122e-08	-5.70765	-0.992738	-4.937	-3.94426	2.90427e-06	0.476574	8.83332e-05	0.00197512	0.0646929	0.0519579	0.0851999	0.023888	0	0.039185	0	0	0	0	0	0
Odoribacter_splanchnicus	1.14574e-07	0.419404	1.51836	1.50224	-0.0161258	0.271964	3.054e-06	1.62558e-05	1	0.0658436	0.0620758	0.106609	0.177276	0.149998	0.211487	0.0476438	0.0377038	0.0671416	0.119226	0.0887312	0.122093
Coriobacteriaceae UCG-002_NA	1.19486e-07	6.14037	2.56462	8.83281	6.26819	0.000130304	0.225999	2.74327e-08	4.16568e-06	0	0	0	0.0100708	0	0.0222334	0.058041	0.0460609	0.0990765	0	0	0.901671
Christensenellaceae R-7 group_NA	1.19486e-07	-2.1101	-0.941531	-5.5613	-4.61977	0.00537671	0.293105	1.17526e-07	9.68334e-06	0.120713	0.0812834	0.136504	0.0474313	0.032445	0.0612239	0.00474571	0	0.0141021	0	0	0
Christensenella_minuta	2.5973e-07	-0.736259	-2.59103	-1.70071	0.890328	0.168681	4.33398e-07	0.00203133	0.15728	0.250849	0.219969	0.309757	0.0397955	0	0.0489135	0.0678322	0.0548306	0.0915424	0.0252214	0.0114152	0.0516945
Sutterella_wadsworthensis	3.5473e-07	8.90377	6.9462	8.66995	1.72375	1.3102e-10	9.4636e-07	6.43613e-10	0.178157	0	0	0	0.0857134	0.0651973	0.0993093	0.196106	0.0496001	0.239598	0.227296	0	0.306329
Fournierella_NA	4.18336e-07	-4.21305	-1.07472	-3.95933	-2.8846	2.5773e-06	0.346269	2.64923e-05	0.00197512	0.600993	0.529485	0.659391	0.200101	0.128928	0.410874	0	0	0.0297796	0	0	0.0280967
Christensenellaceae_NA_NA	4.64294e-07	-3.10586	0.000953278	-4.36073	-4.36169	0.00137744	1	7.64216e-05	5.45697e-05	0.0574863	0.0407951	0.0710337	0.0483481	0.0333938	0.0556199	0	0	0.00114351	0	0	0
Oscillospiraceae_UCG-005_NA	4.64294e-07	0.389072	-1.93159	-4.85168	-2.92009	0.686335	0.0331684	4.49288e-06	0.00832192	0.119038	0.0960583	0.156155	0.0306119	0	0.039185	0.0888456	0.0366965	0.110178	0	0	0
Holdemanella_NA	3.85591e-06	3.50222	2.41363	2.26503	-0.148594	1.50018e-08	0.000182771	0.000451314	0.915037	0.702711	0.610792	0.974748	3.57515	2.51463	4.24037	4.16139	3.37281	5.20155	1.72751	0.528182	2.3991
Eubacterium_callanderi	4.62109e-06	0.414539	-0.619862	-0.761593	-0.141732	0.138919	0.035581	0.0110161	0.741755	0.362941	0.357239	0.411905	0.208131	0.18061	0.222625	0.19963	0.165812	0.244865	0.0964436	0.0594576	0.10367
Blautia_producta	9.33602e-06	-0.813207	0.813133	-1.22026	-2.03339	0.103479	0.152435	0.0148533	9.68334e-06	1.11829	0.972372	1.36664	1.69218	1.48468	1.92933	0.251468	0.215937	0.284603	0.244924	0.0857867	0.267056
Erysipelatoclostridium_ramosum	1.04756e-05	-0.114837	-5.13998	-3.72465	1.41533	0.975282	3.34231e-05	0.00338803	0.369101	0.249597	0.203565	0.262599	0	0	0.00444668	0.0376316	0.0325943	0.0636378	0	0	0
Parasutterella_NA	1.25304e-05	1.03822	-2.59246	0.771905	3.36437	0.206445	0.00103216	0.366962	4.04027e-06	1.18631	0.636313	1.25918	0.0648899	0.0365741	0.167216	0.956367	0.729927	1.04906	0.655764	0.42543	0.921328
Turicibacter_NA	2.20307e-05	-1.0997	-6.8631	-4.46828	2.39481	0.489065	9.4636e-07	0.00200144	0.121339	2.83486	2.20896	4.40946	0	0	0.0296446	0.579233	0.233658	0.885568	0	0	0
Alistipes_finegoldii	5.07706e-05	-1.11722	0.573044	-0.715814	-1.28886	0.0102246	0.283931	0.124164	0.00265441	1.10358	1.0562	1.24459	1.21186	0.878562	1.56156	0.226354	0.156213	0.279928	0.252825	0.196595	0.355395
Anaerostipes_caccae	5.30867e-05	2.46132	-0.321069	1.21628	1.53735	0.000760417	0.782329	0.130244	0.0516825	0.104252	0.0636481	0.105537	0.0615764	0.03708	0.079591	0.125601	0.0864773	0.199262	0.0553054	0.0268252	0.0850874
Ruminococcaceae_CAG-352_NA	7.02377e-05	-4.78918	-0.81279	-4.01496	-3.20217	0.000338336	0.627917	0.00377766	0.0255094	0.0318066	0.0280329	0.0530431	0.0251903	0	0.0306119	0	0	0	0	0	0
Hungatella_NA	7.70831e-05	1.17717	2.15433	-0.183267	-2.3376	0.0760956	0.000755664	0.855599	0.000133683	0.341756	0.211286	0.470257	1.1908	0.841906	1.42294	0.26261	0.220424	0.422066	0.0948092	0.0243712	0.154907
Lachnospiraceae UCG-009_NA	0.00013274	-1.52815	-1.30043	-3.68876	-2.38833	0.0494386	0.137943	9.0294e-06	0.00459995	0.341921	0.324449	0.400662	0.0979582	0.0556199	0.168559	0.0504896	0.0309124	0.067365	0	0	0.0154975
[Eubacterium] fissicatena group_NA	0.000379092	6.99697	-0.180349	4.0799	4.26025	0.000262905	0.992457	0.048619	0.032062	0.0532765	0	0.056178	0.0201417	0	0.0349839	0.0171527	0	1.63181	0.0279039	0	0.460026
Oscillospiraceae_NA_NA	0.000408024	-0.499183	0.372986	0.487281	0.114295	0.076736	0.249412	0.0924698	0.781106	0.510713	0.462333	0.571303	0.515713	0.506899	0.575104	0.166736	0.153194	0.175969	0.284428	0.273167	0.373875
Bacteroides_massiliensis	0.000410385	-1.09171	-0.131141	0.175451	0.306592	0.000895765	0.799779	0.681286	0.457098	15.4239	14.7434	18.9375	13.056	10.3616	13.7953	2.90429	2.27808	4.22291	7.13683	5.28639	9.28038
Bacteria_Firmicutes_Clostridia_Oscillospirales_Ruminococcaceae_UBA1819_NA	0.000426182	-1.46913	-1.2698	-0.748278	0.521525	0.000338336	0.00327824	0.0986559	0.276241	1.31934	1.26116	1.37462	0.453057	0.3708	0.560282	0.223932	0.198766	0.270954	0.447761	0.116768	0.69405
Alistipes_onderdonkii	0.000471855	5.97876	4.81202	6.1747	1.36268	1.01169e-06	0.000147062	5.76228e-07	0.338763	0	0	0	0.531829	0.0770759	2.31714	1.79312	1.69665	1.84359	1.81594	1.39719	2.57303
Parabacteroides_distasonis	0.000624792	-1.10826	-0.594921	-0.326769	0.268152	0.000115803	0.0725976	0.312634	0.457209	5.83224	5.16762	6.22524	3.30598	2.67548	3.75504	0.985994	0.760992	1.58185	2.03878	1.71656	2.4281
Intestinimonas_butyriciproducens	0.000791369	7.77378	5.3914	7.14782	1.75643	7.30472e-06	0.00375952	5.70648e-05	0.338763	0	0	0	0.0311268	0	0.044525	0.11027	0.0135198	0.128687	0	0	0.113649
[Eubacterium] coprostanoligenes group_NA_NA	0.00138629	0.126257	0.84976	1.44949	0.599732	0.837762	0.0950176	0.0013627	0.223578	0.296826	0.247506	0.39884	0.498591	0.377431	0.702859	0.133491	0.107883	0.223503	0.373719	0.197004	0.667658
Bacteroides_vulgatus	0.00165288	1.7109	1.2112	1.47058	0.25938	0.000147605	0.0124005	0.00156665	0.679626	11.56	11.0296	13.3054	22.2851	20.9186	25.5383	18.0502	9.96888	26.0411	12.8632	10.8502	16.3871
Family XIII AD3011 group_NA	0.00314792	-1.30705	-0.241614	0.785916	1.02753	0.0316148	0.782329	0.20859	0.0920363	0.230397	0.213231	0.288104	0.177276	0.161133	0.216264	0.0533879	0.0204045	0.0676094	0.179082	0.0754659	0.388664
Parabacteroides_merdae	0.00494514	-0.0494603	1.36818	0.440052	-0.928131	0.975282	0.0124005	0.453212	0.0920363	1.57438	1.1986	2.39251	3.55165	2.63016	4.0622	0.767689	0.437416	0.984241	0.755942	0.39368	1.4821
Lachnospiraceae_GCA-900066755_NA	0.0104964	-1.63669	-0.741696	-3.51797	-2.77628	0.113539	0.605174	0.00179936	0.0148684	0.106553	0.0965474	0.132731	0.0537111	0.0489791	0.0727721	0.00914808	0	0.0287623	0	0	0
Ruminococcaceae_Incertae Sedis_NA	0.0106817	-0.791011	-1.00975	-2.62981	-1.62006	0.314883	0.260961	0.000813165	0.0452364	0.386726	0.365486	0.431743	0.0979624	0.0765298	0.245057	0.109659	0.072931	0.141844	0.00688776	0	0.044432
Intestinimonas_NA	0.01671	-0.690257	-0.636913	-4.88883	-4.25192	0.663916	0.764514	0.0014643	0.00539646	0.0556616	0.0439525	0.119503	0.0419839	0	0.0604268	0.00781669	0	0.0244	0	0	0
Butyricicoccus_NA	0.0230183	-1.42303	-1.8032	-2.69287	-0.889669	0.140173	0.0862039	0.0074345	0.473441	0.171246	0.149591	0.207526	0.03708	0.023888	0.0531796	0.0365238	0	0.0471912	0	0	0.0116982
Butyricimonas_NA	0.0252137	0.0970718	0.339398	0.672096	0.332699	0.755341	0.249412	0.0074345	0.223578	0.637575	0.546858	0.725827	0.71537	0.580177	0.778679	0.307271	0.253697	0.36302	0.418559	0.30409	0.607688
Marvinbryantia_NA	0.0263097	-1.20967	0.0939033	-0.88846	-0.982363	0.0345128	0.950138	0.129306	0.0920363	4.58413	4.15798	5.09663	4.20629	3.70692	4.36368	0.899	0.682174	1.163	1.02749	0.70742	1.46739
Oscillospiraceae_UCG-003_NA	0.0299031	-1.16338	1.21027	-3.59655	-4.80682	0.526687	0.605174	0.0538491	0.0059143	0.0383995	0	0.0563718	0.0503807	0.0477054	0.0887746	0	0	0.00276833	0	0	0
Alistipes_indistinctus	0.0304813	2.14353	-0.769426	2.06111	2.83054	0.0990966	0.698517	0.124164	0.0319334	0.024523	0	0.0305817	0	0	0.0143116	0.0335885	0.0156871	0.0527024	0.0280238	0	0.0592656
Oscillospira_NA	0.0304813	-1.47058	0.998291	-3.35336	-4.35166	0.396415	0.629763	0.0589468	0.00960616	0.0380546	0	0.0429868	0.0525536	0.0296446	0.0559785	0	0	0.00429529	0	0	0
Adlercreutzia_NA	0.040884	-0.658401	-1.27672	1.38842	2.66514	0.600707	0.361696	0.232071	0.0141779	0.12558	0.124121	0.134476	0.039185	0	0.0815225	0.0362349	0.0214764	0.0581488	0.154975	0	0.205366
Akkermansia_muciniphila	0.0488687	0	17.203	26.5326	9.32962	1	0.000297706	8.30956e-09	0.0503484	0	0	0	0	0	0	0	0	0	0	0	3.34884
Howardella_NA	0.0672755	0	6.46777	0	-4.89048	1	0.0968451	1	0.181612	0	0	0	0.0644641	0	0.109158	0	0	0	0	0	0
Alistipes_shahii	0.0673975	0.441881	-3.35087	-0.137295	3.21357	0.83269	0.0425434	0.958214	0.0375711	0.104521	0.0973821	0.136359	0	0	0	0.0625552	0	0.119822	0.0304406	0	0.0552541
Clostridia_NA_NA_NA_NA	0.0872278	-0.877976	-0.666759	-2.30229	-1.63553	0.314883	0.572442	0.0143677	0.0979489	0.0729591	0.0633655	0.0953693	0.032445	0.0268556	0.0588366	0.0152582	0	0.0297814	0	0	0.00790077
Colidextribacter_NA	0.0955266	-1.61113	0.329425	0.404367	0.074942	0.0896609	0.799779	0.725109	0.986451	0.0715649	0.0649602	0.107704	0.0895656	0.079509	0.0907744	0	0	0.0175389	0.0482218	0.00887852	0.0655857
Peptococcus_NA	0.0988236	-1.27494	-0.323761	-1.22449	-0.90073	0.0570243	0.738084	0.0924698	0.24499	0.0761093	0.0701122	0.08283	0.0447828	0.0402833	0.0483481	0.0120863	0.0051458	0.0187472	0	0	0.0249796
The data are shown as percentage of the total (all reads in one sample = 100%).
We report both the p-values from the likelihood ratio test and from the pairwise Wald tests. The p-values were adjusted using Benjamin-Hochberg correction.
Only taxa with lrt_pval_adj ˂ 0.1 are shown.
The reported effect size is log 2 fold change obtained by DESeq2.
