# Supplementary material for: Protective Effect of Vegan Microbiota on Liver Steatosis Is Conveyed by Dietary Fiber: Implications for Fecal Microbiota Transfer Therapy
Source: Nutrients. 2023 Jan 15;15(2):454. doi: 10.3390/nu15020454 (PMC9867259; doi:10.3390/nu15020454)
Supplement: Supplementary file 1 [file nutrients-15-00454-s001.zip › Table S3_cecum_VOCs.xlsx]

## Sheet: summary
Table S3 Volatile organics compounds spectrum in cecum.
	lrt_pval	posthoc_adj_pvalue				cliff´s delta				SD			WD			SD+I			WD+I
	_adjust	SD+I_SD	WD_SD	WD+I_SD	WD+I_WD	SD+I_SD	WD_SD	WD+I_SD	WD+I_WD	median	Q1	Q3	median	Q1	Q3	median	Q1	Q3	median	Q1	Q3
2-Pentadecanone	0.00792068	0.0130516	0.0339888	4.96805e-05	0.034575	0.90625	0.861111	1	0.84127	0.0655471	0.0138618	0.16137	0.287354	0.216712	0.372096	0.33868	0.31746	0.415778	0.632946	0.513276	0.697511
Dimethyl trisulfide	0.0172411	0.0265483	0.753644	0.00671881	0.00347053	-0.71875	0.0555556	-0.857143	-1	0.352483	0.164889	0.434944	0.35636	0.221282	0.40102	0.104119	0.0173137	0.144028	0.0166187	0.014495	0.116907
Hexadecane	0.0255727	0.437858	0.194908	0.0501897	0.00101742	-0.375	-0.472222	0.857143	0.968254	0.0175373	0.0132291	0.0761006	0.0133683	0.00670465	0.0148838	0.0132503	0.0117695	0.0167642	0.288788	0.280861	0.588009
m-Cymene	0.0663662	0.302177	0.242918	0.00259021	0.0468566	0.40625	0.444444	0.928571	0.714286	0.113427	0.0520477	0.156272	0.188496	0.118936	0.207837	0.16308	0.122987	0.2267	0.295926	0.271034	0.319223
Hexanoic acid, ethyl ester	0.0663662	0.586045	0.474188	0.00537615	0.0290243	0.25	0.333333	0.892857	0.777778	0.591639	0.455176	1.04383	0.903437	0.629292	1.14629	0.799047	0.6315	1.19261	1.66209	1.48879	1.69308
unknown (RI 1703)	0.0663662	0.0340476	0.665335	0.026495	0.0371778	0.75	0.222222	0.785714	0.68254	0.0130742	0.0095691	0.0315346	0.0148838	0.0133683	0.0414168	0.222324	0.0602483	0.303215	0.294602	0.0459857	0.398778
n-Decanoic acid	0.0663662	0.957493	0.168109	0.0212251	0.220377	0.125	0.444444	0.821429	0.333333	0.173548	0.134889	0.206297	0.501042	0.170785	0.697401	0.184548	0.130922	0.282867	0.601423	0.540402	0.835281
unknown (RI 1348)	0.0663662	0.274042	0.146389	0.280058	0.614515	0.53125	-0.555556	-0.464286	0.238095	0.234443	0.201872	0.268578	0.164984	0.103067	0.195015	0.311233	0.275921	0.419975	0.178317	0.122389	0.225269
1-Heptanol	0.0663662	0.408717	0.165934	0.00734943	0.148851	0.375	0.444444	0.892857	0.460317	0.734347	0.588704	0.89691	1.16332	0.696138	1.34109	0.859894	0.782489	1.05462	1.64566	1.60643	1.84649
Indole	0.0713199	0.0803283	0.550663	0.576086	0.885203	-0.65625	0.277778	0.25	-0.0793651	8.53029	7.8477	9.32674	9.22547	8.13707	10.9467	3.51981	2.88899	6.38537	9.42446	7.52228	9.87742
1-Butanol	0.0713199	0.0119525	0.58698	0.2989	0.514805	0.78125	0.25	0.464286	0.269841	5.79423	3.69174	8.0825	7.79982	5.22771	8.71477	15.6689	13.2608	17.1426	9.03395	6.38256	10.1599
1,2-Benzisothiazole	0.0713199	0.0530967	0.522261	0.50719	0.224628	-0.65625	-0.138889	0.142857	0.714286	0.463835	0.34071	1.16472	0.451451	0.367191	0.512095	0.216766	0.12188	0.323057	0.926823	0.739928	0.951288
Tetradecanal	0.0713199	0.0426421	0.680823	0.343623	0.205447	0.75	-0.166667	0.392857	0.396825	0.108303	0.0254177	0.157327	0.0466866	0.0148838	0.113091	0.528873	0.376211	0.827481	0.177832	0.0865916	0.691443
Butanoic acid	0.0713199	0.0308273	0.835858	1	0.973895	0.8125	0.0555556	0.142857	0.0793651	4.07365	2.90323	4.85623	4.63815	2.77591	5.37574	8.19702	5.98334	8.63937	4.46821	3.70854	5.59068
2-Tridecanone	0.0807767	0.24871	0.0834396	0.512664	0.0312827	-0.28125	-0.555556	-0.0357143	0.873016	0.738669	0.234128	1.1499	0.195921	0.0147516	0.386385	0.346473	0.273928	0.391868	0.725671	0.597706	0.784992
Acetic acid	0.0807767	0.590653	0.831102	0.0304077	0.0225767	0.28125	0.0833333	0.785714	0.777778	4.61151	3.89265	4.86012	4.95864	2.62347	5.34954	5.06889	4.13298	5.95989	6.41996	5.86527	7.34378
Benzoic acid	0.0831711	0.626918	0.800347	0.0331095	0.0259071	0.21875	-0.138889	0.821429	0.777778	0.357842	0.296193	0.414839	0.376221	0.213601	0.396809	0.40665	0.319935	0.484464	0.526855	0.477221	0.669696
The data are shown as percentage of the total (the sum of the area under all peaks in one spectrum = 100%).
We report both the p-values from the likelihood ratio test and from the pairwise Wald tests. The p-values were adjusted using Benjamin-Hochberg correction.
Only compounds with lrt_pval_adj ˂ 0.1 are shown.
The reported effect size is caculated as Cliff s delta.
